# Supplementary material
Source: PubMed Central journal article supplement (PMC3019619)
Supplement: supp_55_1_42__3.pdf [file supp_55_1_42__3.pdf]

TABLE S1. Antiviral activities of different EVG lots<sup>a</sup>

| Company                    | EC <sub>50</sub> <sup>b</sup> | EC <sub>95</sub> <sup>b</sup> | Washout EC <sub>50</sub> <sup>b</sup> | EC <sub>50</sub> adjusted <sup>c</sup> |
|----------------------------|-------------------------------|-------------------------------|---------------------------------------|----------------------------------------|
| Selleck Chemicals          | 0.00075 ± 0.00007             | 0.041 ± 0.006                 | 0.052 ± 0.015                         | 69.2                                   |
| Toronto Research Chemicals | 0.0012 ± 0.0004               | 0.027 ± 0.008                 | 0.034 ± 0.003                         | 29.9                                   |
| Santa Cruz Biotechnology   | 0.001 ± 0.0001                | 0.021 ± 0.011                 | 0.066 ± 0.010                         | 65.6                                   |

<sup>a</sup>Average and deviation of one experiment conducted in duplicate.

<sup>b</sup>μM

<sup>c</sup>Washout EC<sub>50</sub>/EC<sub>50</sub>.
