# Supplementary material
Source: PubMed Central journal article supplement (PMC3019619)
Supplement: supp_55_1_42__4.pdf [file supp_55_1_42__4.pdf]

## Supplemental information

FIG. S1. Virucidal activities of pre-washed MNP-virus-drug complexes. HIV-Luc was pre-incubated with the indicated level of drug based on Table 1 values for 1 h at 37 °C prior to 5 min incubation with MNPs. The resulting mixtures were extensively washed to remove unbound drug prior to HeLa-T4 cell infection. Note that the highest attainable NVP dose was 250x EC<sub>95</sub>. \*,  $P < 0.01$ ; \*\*,  $P < 0.001$  as compared to the no drug control (Student's *t*-test).

FIG. S2. EVG requires internalization to reveal its PAE. Activated PBMC pre-treated with the indicated levels of EVG or TDF were washed, or washed and treated with trypsin for 10 min at 37 °C (and then re-washed) prior to virus infection. Normalized levels of HIV-Luc infectivities are expressed as percent of non-drug treated control samples. HIV-Luc was pseudotyped with VSV-G in this experiment to sidestep the loss of the CD4 receptor by trypsinization.
