# Supplementary material
Source: PubMed Central journal article supplement (PMC3019619)

# Figure S1

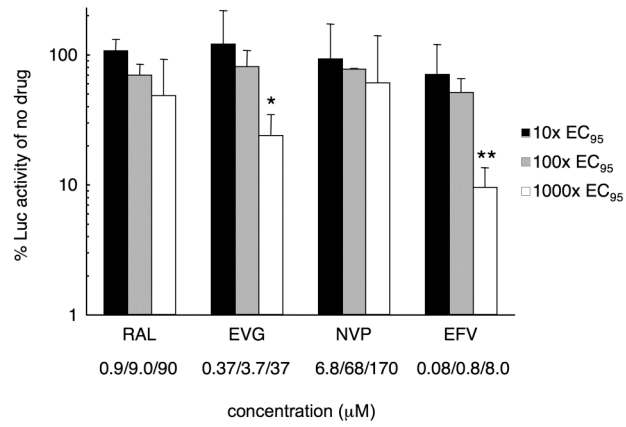

Supplement: supp_55_1_42__1.pdf [file supp_55_1_42__1.pdf]

Figure S2

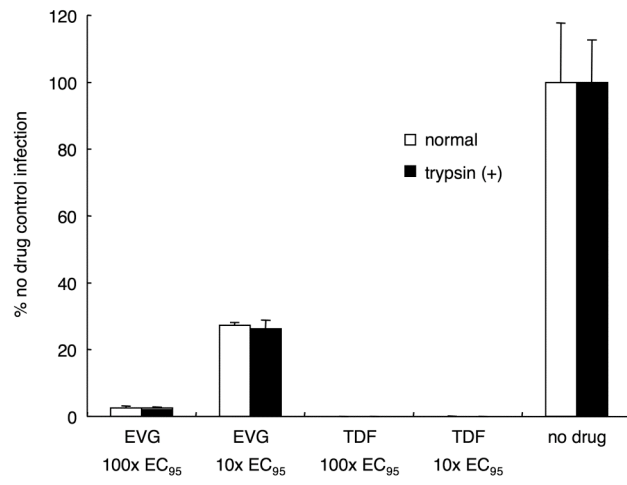

Supplement: supp_55_1_42__2.pdf [file supp_55_1_42__2.pdf]
